# Supplementary material for: The coexistence of Lactiplantibacillus and Wickerhamomyces in sugarcane top silage drives potential pathogen suppression and aerobic stability through enhanced lactic acid and acetic acid production
Source: Research Square preprint supplement (doi:10.21203/rs.3.rs-8832064/v1), 2026-02-17
Supplement: Supplementary file 1 [file c0990389f286c532af4ef9ac.docx]

Table S1 The chemical composition and microbial population of freash sugarcane tops.

| Items | | Fresh sugarcane tops |
| --- | --- | --- |
| Chemical composition | DM (g/kg FM) | 298.6 |
| WSC (g/kg DM) | 168.05 |
| CP (g/kg DM) | 61.1 |
| NDF (g/kg DM) | 683.52 |
| ADF (g/kg DM) | 442.84 |
| Ash (g/kg DM) | 64.81 |
|  | OM (g/kg DM) | 935.19 |
|  | pH | 6.54 |
| Microbial counts (lg CFU/g FM) | LAB | 3.86 |
| Yeast | 4.08 |
| Mold | 2.05 |
| EB | 3.55 |
| DM, dry matter; WSC, water-soluble carbohydrates; CP, crude protein; NDF, neutral detergent fiber; ADF, acid detergent fiber; OM, organic matter；LAB, lactic acid bacteria; EB, enterbacteria. | | |
|

**Table S2** Changes in microbial counts during ensiling of sugarcane tops.

|  |  | Ensiling time | | | | |  |  |  |  |
| --- | --- | --- | --- | --- | --- | --- | --- | --- | --- | --- |
| Items | Treatments | 3 | 7 | 12 | 30 | 60 | SEM | T | A | T*A |
| LAB (lg CFU/g FM) | CK | 4.82b | 5.64a | 6.50a | 5.39b | 3.93b | 0.295 | <0.01 | <0.01 | <0.01 |
| AB | 2.34c | 3.48b | 4.56b | 4.34c | 3.71c |  |  |  |  |
| AF | 5.06a | 5.22a | 6.45a | 5.74a | 5.34a |  |  |  |  |
| NA | 0d | 0c | 0.12c | 0.26d | 0.12d |  |  |  |  |
| Yeast (lg CFU/g FM) | CK | 1.24b | 0.32b | 1.2b | 1.81b | 1.90b | 0.221 | <0.01 | <0.01 | <0.01 |
| AB | 3.85a | 4.09a | 4.83a | 4.57a | 3.99a |  |  |  |  |
| AF | 0.42c | 0.22b | 0d | 0c | 0.35d |  |  |  |  |
| NA | 0d | 0b | 0.42c | 0.06c | 0.90c |  |  |  |  |
| Mold(lg CFU/g FM) | CK | 1.61a | 0.57 | 0.34b | 0.49b | 1.42b | 0.113 | <0.01 | <0.01 | <0.01 |
| AB | 0.62b | 1.2 | 2.60a | 2.32a | 1.94a |  |  |  |  |
| AF | 0c | 0 | 0c | 0c | 0.16c |  |  |  |  |
| NA | 0.03c | 0 | 0c | 0.06c | 0c |  |  |  |  |
| LAB, lactic acid bacteria; FM, fresh matter. CK, naturally silage; AB, silage with epiphytic microorganisms after addition of antibacterial agent; AF, silage with epiphytic microorganisms after addition of antifungal agent; NA, silage withγ-sterilized. a–dMeans within a column without a common superscript letter differ significantly at *P* < 0.05. | | | | | | | | | | |
|

**Table S3** Changes in fermentation parameters during ensiling of sugarcane tops.

|  |  | Ensiling time | | | | |  |  |  |  |
| --- | --- | --- | --- | --- | --- | --- | --- | --- | --- | --- |
| Items | Treatments | 3 | 7 | 12 | 30 | 60 | SEM | T | A | T*A |
| pH | CK | 5.92b | 4.72b | 4.53c | 4.35c | 4.20b | 0.121 | <0.01 | <0.01 | <0.01 |
| AB | 6.51a | 6.26a | 5.88b | 5.95b | 5.34a |  |  |  |  |
| AF | 5.74b | 4.60b | 4.27d | 3.93d | 3.77c |  |  |  |  |
| NA | 6.45a | 6.29a | 6.09a | 6.47a | 5.27a |  |  |  |  |
| LA (g/kg DM) | CK | 6.29b | 7.41b | 10.45a | 14.94b | 13.28b | 0.999 | <0.01 | <0.01 | <0.01 |
| AB | 9.05a | 3.44c | 2.95b | 3.26c | 2.66c |  |  |  |  |
| AF | 6.04b | 9.73a | 14.06a | 29.21a | 27.59a |  |  |  |  |
| NA | 3.81b | 3.19c | 3.48b | 4.32c | 3.52c |  |  |  |  |
| AN (g/kg DM) | CK | 0.14b | 0.14b | 0.21b | 0.29b | 0.23b | 0.013 | <0.01 | <0.01 | <0.01 |
| AB | 0.16b | 0.14b | 0.19bc | 0.36b | 0.21b |  |  |  |  |
| AF | 0.19a | 0.20a | 0.27a | 0.53a | 0.30ab |  |  |  |  |
| NA | 0.15b | 0.13b | 0.17c | 0.16c | 0.37a |  |  |  |  |
| Ethnol (g/kg DM) | CK | 3.64 | 4.70 | 10.83b | 13.95b | 13.60b | 0.179 | <0.01 | <0.01 | <0.01 |
| AB | 11.09 | 11.22 | 28.25a | 62.94a | 35.45a |  |  |  |  |
| AF | 10.31 | 12.41 | 8.15b | 19.00b | 13.62b |  |  |  |  |
| NA | 6.72 | 9.45 | 7.55b | 11.42b | 8.67b |  |  |  |  |
| AA (g/kg DM) | CK | 4.71b | 6.53b | 10.42a | 10.26a | 8.93b | 0.043 | <0.01 | <0.01 | 0.01 |
| AB | 3.71b | 3.95c | 4.35b | 6.46b | 5.92c |  |  |  |  |
| AF | 6.64a | 9.35a | 11.68a | 11.33a | 13.33a |  |  |  |  |
| NA | 3.87b | 3.38c | 4.43b | 3.68b | 4.10c |  |  |  |  |
| BA (g/kg DM) | CK | 1.93 | 1.66c | 1.9 | 2.47 | 2.02 | 0.004 | <0.01 | 0.20 | 0.19 |
| AB | 2.19 | 2.03b | 2.12 | 2.43 | 1.97 |  |  |  |  |
| AF | 2.28 | 2.17b | 2.08 | 2.56 | 1.93 |  |  |  |  |
| NA | 2.37 | 2.42a | 1.91 | 2.27 | 1.73 |  |  |  |  |
| LA, lactic acid; AA, acetic acid; PA, propionic acid; BA, butyric acid; AN, ammonia nitrogen; DM, dry matter; SEM, standard error of the mean. CK, naturally silage; AB, silage with epiphytic microorganisms after addition of antibacterial agent; AF, silage with epiphytic microorganisms after addition of antifungal agent; NA, silage with γ-sterilized. a–dMeans within a column without a common superscript letter differ significantly at P < 0.05. | | | | | | | | | | |
|

**Table S4** Physiological and biochemical characteristics of strains G35 and G32-15.

|  | G35 | G32-15 |
| --- | --- | --- |
| Glucose | + | + |
| Lactose | + | + |
| Maltose | + | + |
| Mannitol | - | + |
| Sucrose | + | + |
| Arabinose | + | + |
| Xylose | + | + |
| Sorbitol | + | + |
| Rhamnose | - | + |
| Salicin | + | + |
| Aescin | + | - |
| Muscose | + | + |
| Raffinose | - | + |
| Fructose | + | + |
| Melbiose | + | + |
| Cellobiose | + | + |
| Starch | - | - |
| Galactose | + | + |
| +, positive; -, negative |  |  |
